# Supplementary material
Source: Springer Nature journal article supplement (https://www.springermedizin.de/resource/supplementary/12993_2011_349_MOESM1_ESM.pdf/9617580)
Supplement: MOESM1 [file 9617580]

|                      |                                                                                                                                                                                                                                            |
|----------------------|--------------------------------------------------------------------------------------------------------------------------------------------------------------------------------------------------------------------------------------------|
| Condition            | <p>Cue                                          Go                                          Cue                                          Nogo</p>                                                                                          |
| Stimulus             | <p>XOX                                          OXO                                          XOX                                          O not-X O</p>                                                                                    |
| Time (ms)            | <p> </p>                                                                                                                                                                                                                                   |
| Behavioural Response | <p> <span style="margin-left: 200px;">Motor response execution</span> <span style="margin-left: 400px;">Motor response inhibition</span> </p>                                                                                              |
| ERP components       | <p> <span style="margin-left: 150px;">Cue P3    CNV</span> <span style="margin-left: 200px;">Go N2    Go P3</span> <span style="margin-left: 300px;">Cue P3    CNV</span> <span style="margin-left: 150px;">Nogo N2    Nogo P3</span> </p> |
